# Supplementary material for: Anti-inflammatory activity of collagen peptide in vitro and its effect on improving ulcerative colitis
Source: PubMed Central journal article supplement — NPJ Sci Food. 2025 Jan 2;9:1. doi: 10.1038/s41538-024-00367-7 (PMC11697389; doi:10.1038/s41538-024-00367-7), 2025-01-02
Supplement: 41538_2024_367_MOESM1_ESM.pdf [file 41538_2024_367_MOESM1_ESM.pdf]

Blank DSS L-CP H-CP 5-ASA

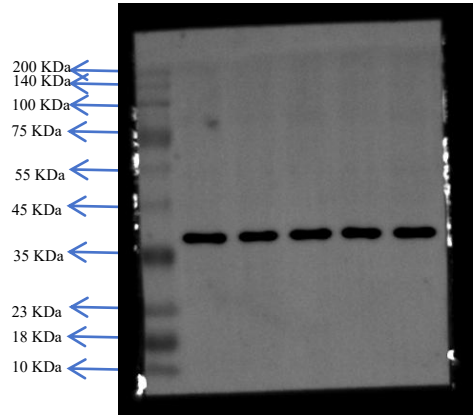

GAPDH 37 KDa

Blank DSS L-CP H-CP 5-ASA

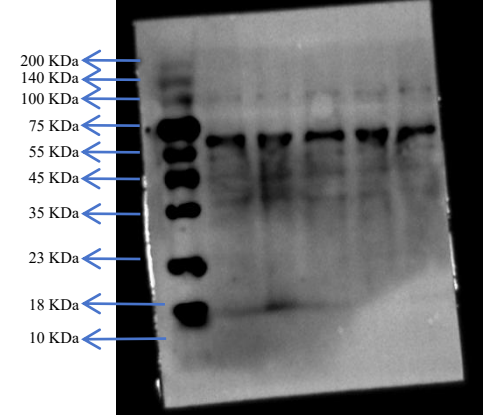

p65 65 KDa

Blank DSS L-CP H-CP 5-ASA

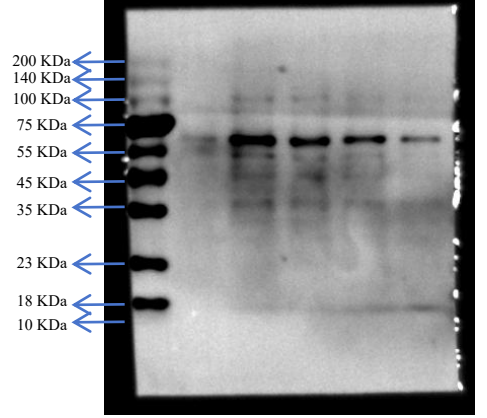

P-p65 65 KDa

Blank DSS L-CP H-CP 5-ASA

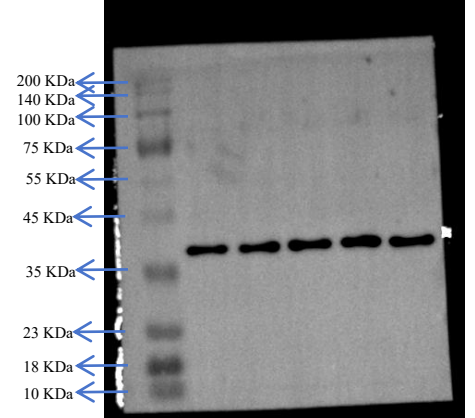

IκBα 36 KDa

Blank DSS L-CP H-CP 5-ASA

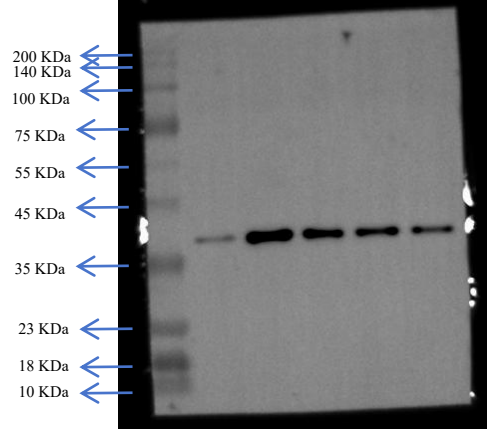

P-IκBα 36 KDa

Blank DSS L-CP H-CP 5-ASA

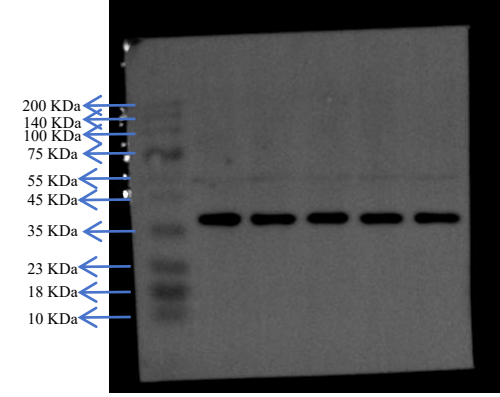

GAPDH 37 KDa

Blank DSS L-CP H-CP 5-ASA

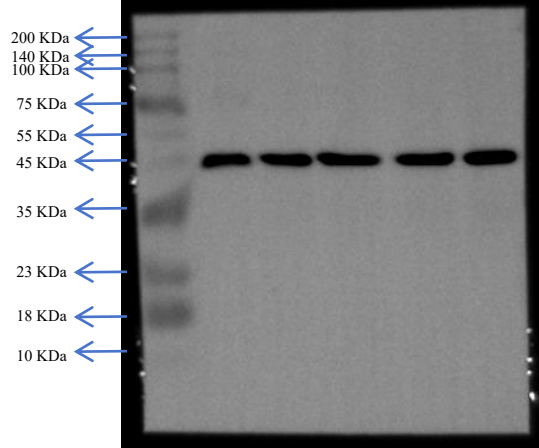

p38 MAPK 41 KDa

Blank DSS L-CP H-CP 5-ASA

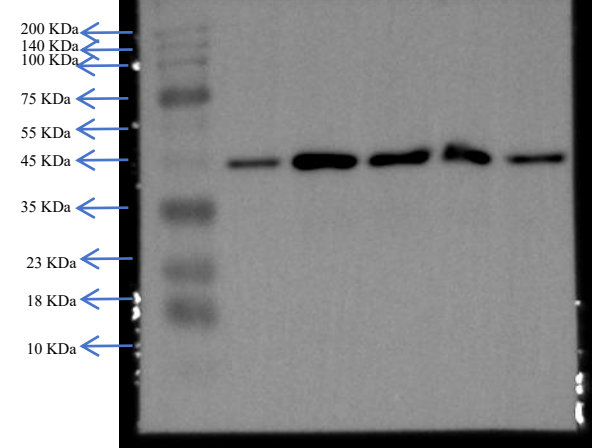

P-p38 MAPK 42 KDa
